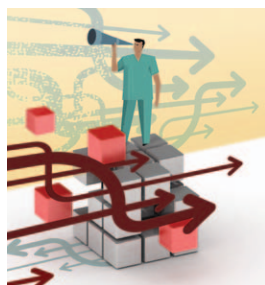

## ON THE COVER:

This month's issue includes two articles highlighting very different approaches to coordination of preoperative assessment and an editorial about why multiple solutions are needed in the real world. The cover art depicts the role described by the editorialist of the anesthesiologist as the best-placed individual to direct the multiple pieces of information, testing and consultation needed to determine the path forward to surgery.

- Newman *et al.*: The Evolution of Anesthesiology and Perioperative Medicine, p. 1005
- Thilen *et al.*: Patterns of Preoperative Consultation and Surgical Specialty in an Integrated Healthcare System, p. 1028
- Phillips *et al.*: Global Health Implications of Preanesthesia Medical Examination for Ophthalmic Surgery, p. 1038

## THIS MONTH IN ANESTHESIOLOGY

1A

## EDITORIAL VIEWS

### Targeting Purinergic Signaling for Perioperative Organ Protection

Holger K. Eltzschig

1001

### The Evolution of Anesthesiology and Perioperative Medicine

Mark F. Newman, Joseph P. Mathew, and Solomon Aronson

1005

### Trust, but Verify: Examining the Role of Observational Data in Perioperative Decision-making

Mark D. Neuman and Chad M. Brummett

1008

### Shedding New Light on an Old Technique

John E. Fiadjoe and Paul A. Stricker

1011

### Anesthetic Effects on $\gamma$ -Aminobutyric Acid A Receptors: Not Just on Your Nerves

George Gallos and Charles W. Emala

1013

### In Utero Myelomeningocele Repair: Baby Steps and Giant Leaps for Fetal Surgery

Michael G. Richardson and Ronald S. Litman

1016

## SPECIAL ARTICLES

### Military Anesthesia Trainees in WWII at the University of Wisconsin: Their Training, Careers, and Contributions

Colby L. Parks and Mark E. Schroeder

1019

During World War II, military physicians received anesthesia training at academic institutions across the country. Ralph Waters and the Wisconsin General Hospital anesthesia department trained 17 officers, many of whom went on to productive careers in anesthesiology.

◇ Refers to This Month in Anesthesiology

◆ Refers to Editorial Views

See Supplemental Digital Content

CME CME Article

## ■ PERIOPERATIVE MEDICINE

- ◆ **Patterns of Preoperative Consultation and Surgical Specialty in an Integrated Healthcare System** 1028

*Stephan R. Thilen, Christopher L. Bryson, Robert J. Reid, Duminda N. Wijeyesundera, Edward M. Weaver, and Miriam M. Treggiari*

There is substantial practice variation among surgical specialties with regard to the use of preoperative consultations and these are frequently provided for patients with low cardiac risk presenting for low-risk surgeries.

- ◆ **Global Health Implications of Preanesthesia Medical Examination for Ophthalmic Surgery** 1038

*Michael B. Phillips, Rick E. Bendel, Julia E. Crook, and Nancy N. Diehl*

Ophthalmic preanesthesia medical examination frequently detects new or unstable medical conditions, which do not typically alter perioperative procedures. However, these conditions are relevant to long-term health and should be conveyed to primary care physicians for further evaluation.

- CME ◆ **Perioperative Comparative Effectiveness of Anesthetic Technique in Orthopedic Patients** 1046

*Stavros G. Memtsoudis, Xuming Sun, Ya-Lin Chiu, Ottokar Stundner, Spencer S. Liu, Samprit Banerjee, Madhu Mazumdar, and Nigel E. Sharrock*

The impact of anesthetic technique on perioperative outcomes remains controversial. Analyzing a large national sample, the authors demonstrate superior postoperative outcomes associated with the utilization of neuraxial *versus* general anesthesia for primary joint arthroplasty.

- ◆ **Retrograde Light-guided Laryngoscopy for Tracheal Intubation: Clinical Practice and Comparison with Conventional Direct Laryngoscopy** 1059

*Tao Yang, Jiong Hou, Jinbao Li, Xu Zhang, Xiaoyan Zhu, Wen Ni, Yanfei Mao, and Xiaoming Deng*

Retrograde light-guided laryngoscopy for tracheal intubation uses transtracheal light transmission from a source attached to the skin to illuminate the glottis. Nine residents, six medical students and five nurses who had never intubated a patient each attempted to intubate 10 patients, using direct laryngoscopy in five of them and retrograde light-guided laryngoscopy in five in a randomly assigned order. The overall success rate using direct laryngoscopy was 47% while that with retrograde light-guided laryngoscopy was 72%. The median cumulative times to glottis exposure and to tracheal intubation were decreased and glottic exposure was improved when retrograde light-guided laryngoscopy was used.

- ◆ **Isoflurane Regulates Atypical Type-A  $\gamma$ -Aminobutyric Acid Receptors in Alveolar Type II Epithelial Cells** 1065

*Yun-Yan Xiang, Xuanmao Chen, Jingxin Li, Shuanglian Wang, Gil Faclier, John F. MacDonald, James C. Hogg, Beverley A. Orser, and Wei-Yang Lu*

Isoflurane increases the activity of  $\gamma$ -aminobutyric acid type A receptors in human alveolar type II epithelial cells and reduces the expression of cyclooxygenase-2 in these cells by regulating these receptors.

- Involvement of the Tyr Kinase/JNK Pathway in Carbachol-induced Bronchial Smooth Muscle Contraction in the Rat** 1076

*Hiroyasu Sakai, Yu Watanabe, Mai Honda, Rika Tsuiki, Yusuke Ueda, Yuki Nagai, Minoru Narita, Miwa Misawa, and Yoshihiko Chiba*

The aim of the current study was to investigate the involvement of the Tyr kinase pathway in the contraction of bronchial smooth muscle. The Tyr kinase/JNK pathway may play a role in bronchial smooth muscle contraction.

- Early Exposure to General Anesthesia Disturbs Mitochondrial Fission and Fusion in the Developing Rat Brain** 1086

*Annalisa Boscolo, Desanka Milanovic, John A. Starr, Victoria Sanchez, Azra Oklopacic, Laurie Moy, Carlo Ori C, Alev Erisir, and Vesna Jevtovic-Todorovic*

General anesthesia impairs the fine balance between mitochondrial fusion and fission, leading to acute mitochondrial fragmentation. The mechanism involves sequestration and polymerization of fission protein, Drp-1 and downregulation of fusion protein, Mfn-2.

**Surgery Results in Exaggerated and Persistent Cognitive Decline in a Rat Model of the Metabolic Syndrome** 1098

*Xiaomei Feng, Vincent Degos, Lauren G. Koch, Steven L. Britton, Yinggang Zhu, Susana Vacas, Niccolò Terrando, Jeffrey Nelson, Xiao Su, and Mervyn Maze*

Rats with Metabolic Syndrome have exaggerated memory decline in the immediate postoperative period. Also, postoperative Metabolic Syndrome rats have long-lasting learning and memory dysfunction that persists for no less than 5 months.

**Magnetic Resonance Imaging Analysis of the Spread of Local Anesthetic Solution after Ultrasound-guided Lateral Thoracic Paravertebral Blockade: A Volunteer Study** 1106

*Daniela Marhofer, Peter Marhofer, Stephan C. Kettner, Edith Fleischmann, Daniela Prayer, Melanie Schernthaner, Edith Lackner, Harald Willschke, Pascal Schwetz, and Markus Zeitlinger*

The authors investigated the spread of local anesthetic after thoracic paravertebral blockade *via* magnetic resonance imaging. Whereas the spread was constant with approximately four vertebral levels, the sensory distribution was within a wide range.

**Postoperative Recovery with Bispectral Index *versus* Anesthetic Concentration-guided Protocols** 1113

*Bradley A. Fritz, Preetika Rao, George A. Mashour, Arbi ben Abdallah, Beth A. Burnside, Eric Jacobsohn, Lini Zhang, and Michael S. Avidan*

Use of a bispectral index-guided anesthetic protocol did not lead to faster recovery or decreased incidence of nausea, vomiting, or pain, compared with an end-tidal anesthetic concentration-guided protocol.

**Neuroprotective Effects of Dexmedetomidine against Glutamate Agonist-induced Neuronal Cell Death Are Related to Increased Astrocyte Brain-derived Neurotrophic Factor Expression** 1123

*Vincent Degos, Tifenn Le charpentier, Vibol Chhor, Olivier Brissaud, Sophie Lebon, Leslie Schwendimann, Nathalie Bednareck, Sandrine Passemard, Jean Mantz, and Pierre Gressens*

The authors' study showed that dexmedetomidine neuroprotective effects are mediated by brain-derived neurotrophic factor modulation in perinatal brain injury. Dexmedetomidine increased astrocyte expression of brain-derived neurotrophic factor through extracellular signal regulated kinase-dependent pathway.

**Operating Room Fires: A Closed Claims Analysis** 1133

*Sonya P. Mehta, Sanjay M. Bhananker, Karen L. Posner, and Karen B. Domino*

Electrocautery-induced fires during monitored anesthesia care were the most common cause of operating room fire claims. Supplemental oxygen by an open delivery system served as the oxidizer in nearly all of the fires.

■ CRITICAL CARE MEDICINE

**Activation of Triggering Receptor Expressed on Myeloid Cells-1 Protects Monocyte from Apoptosis through Regulation of Myeloid Cell Leukemia-1** 1140

*MeiTing Cai, QiXing Chen, Chi Chen, XiWang Liu, JinChao Hou, CongLi Zeng, Qiang Shu, and XiangMing Fang*

TREM-1 protected monocytes from apoptosis through activation of both Erk and Akt pathways and increased expression of Mcl-1 protein. TREM-1 levels were inversely correlated to the magnitude of apoptosis in monocytes in septic patients.

◆ **Impact of the Prone Position in an Animal Model of Unilateral Bacterial Pneumonia Undergoing Mechanical Ventilation** 1150

*Sylvain Ladoire, Laure-Anne Pauchard, Saber-Davide Barbar, Pierre Tissieres, Delphine Croisier-Bertin, and Pierre-Emmanuel Charles*

Mechanical ventilation promotes tissue damages and inflammation if applied to preinjured lungs, worsening in turn bacterial pneumonia. Prone position improved bacterial clearance, decreased injury and inflammatory mediators release as well in ventilated rabbits.

## CONTENTS

### ■ PAIN MEDICINE

#### **Effects of Naloxone on Opioid-induced Hyperalgesia and Tolerance to Remifentanyl under Sevoflurane Anesthesia in Rats** 1160

*Delia Aguado, Mariana Abreu, Javier Benito, Javier Garcia-Fernandez, and Ignacio A. Gómez de Segura*

An ultra-low dose of naloxone blocked remifentanyl-induced hyperalgesia and the associated minimum alveolar concentration increase but did not change opioid tolerance under inhalant anesthesia.

#### **Predicting Acute Pain after Cesarean Delivery Using Three Simple Questions** 1170

*Peter H. Pan, Ashley M. Tonidandel, Carol A. Aschenbrenner, Timothy T. Houle, Lynne C. Harris, and James C. Eisenach*

A three-item preoperative screening questionnaire in assessing anxiety, anticipated postcesarean pain and analgesic need provides a meaningful parsimonious combination of predictors that reliably yields a validated predictive model accounting for 20% of the variance in postcesarean pain.

#### **Treatment with Carbon Monoxide-releasing Molecules and an HO-1 Inducer Enhances the Effects and Expression of $\mu$ -Opioid Receptors during Neuropathic Pain** 1180

*Arnau Hervera, Sergi Leáñez, Roberto Motterlini, and Olga Pol*

Carbon monoxide-releasing molecules or inducible heme oxygenase inducer treatments enhance the local antinociceptive effects of morphine during neuropathic pain through enhancing  $\mu$ -opioid receptors peripheral expression and inhibiting microglial activation and neuronal/inducible nitric oxide synthases overexpression.

### ■ EDUCATION

#### CASE SCENARIO

#### **Compartment Syndrome of the Forearm in Patient with an Infraclavicular Catheter: Breakthrough Pain as Indicator** 1198

*José A. Aguirre, Daniela Gresch, Annemarie Popovici, Jost Bernhard, and Alain Borgeat*

#### IMAGES IN ANESTHESIOLOGY

#### **The Value of Ultrasound in the Safe Care of a Patient with Neurofibromatosis** 1206

*Aditee Parag Ambardekar, Arjunan Ganesh, and Alan Jay Schwartz*

#### **Esophageal Atresia with Double Tracheoesophageal Fistula** 1207

*Yuvesh Passi, Venkata Sampathi, Joelle Pierre, Michael Caty, and Jerrold Lerman*

#### **Expect the Unexpected: Neonatal Oral Mass Diagnosed at Birth** 1208

*Jorge A. Galvez, Angela Rodriguez, Indira Chandrasekar, and Virgil Airola*

#### **ANESTHESIA LITERATURE REVIEW** 1209

#### REVIEW ARTICLE

#### ◆ **Anesthesia for *In Utero* Repair of Myelomeningocele** 1211

*Marla Ferschl, Robert Ball, Hanmin Lee, and Mark D. Rollins*

Fetal myelomeningocele repair may be preferable to postnatal repair. The pathophysiology of myelomeningocele and anesthetic management of open fetal myelomeningocele surgery are discussed. The success of this unique procedure relies on a well-coordinated multidisciplinary approach.

#### MIND TO MIND

#### **Counting Backward** 1224

*Vincent J. Kopp*

#### **6 of 12** 1227

*Donald Heindel*

## CONTENTS

### ■ CORRESPONDENCE

#### **There Is No Place Clean: The Clinical Utility of a Postdischarge Nausea and Vomiting Score** 1229

Zeng Yanzhi

#### **In Reply**

Christian C. Apfel, Kimberly E. Souza, Beverly K. Philip, Jan Odom-Forren, Vallire D. Hooper, Oliver C. Radke, Joseph Ruiz, and Anthony Kovac

---

#### **Comparative Effectiveness Research It Is Not** 1231

Paul S. Myles

#### **Why Does Bispectral Index Monitoring Not Perform Better?**

Harry Scheinin and Jaakko W. Långsjö

#### **To BIS or Not to BIS**

Mohammad A. Helwani

#### **In Reply**

Stavros G. Memtsoudis and Spencer S. Liu

#### **In Reply**

George A. Mashour, Amy Shanks, and Michael Avidan

---

#### **Let's Go Down the Correct Path(way)** 1237

Matthew R. Johnson and Mark J. Rice

#### **In Reply**

Thomas Lescot, Constantine Karvellas, Marc Beaussier, and Sheldon Magder

---

#### **Intralipid: The New Magic Bullet in Cardioprotection?** 1237

Matthias L. Riess and Mihai V. Podgoreanu

#### **In Reply**

Jingyuan Li, Jean C. Bopassa, Siamak Rahman, and Mansoureh Eghbali

---

#### **Desflurane, Isoflurane and...Ragweed** 1240

Mohamed Tiourine and Carl Lynch III

### ■ ANESTHESIOLOGY REFLECTIONS FROM THE WOOD LIBRARY-MUSEUM

#### **The McMechans' 1937 Loving Cup** 1085

George S. Bause

#### **Statikil Sparked Paul Wood's Interest** 1159

George S. Bause

#### **Paul Wood's Ambulance Training near Allentown** 1169

George S. Bause

#### **No Swan Song for Baron Justus von Liebig** 1197

George S. Bause

## CONTENTS

### ■ REVIEWS OF EDUCATIONAL MATERIAL

1242

### ■ ERRATUM

#### Effects of Fibrinogen Concentrate as First-line Therapy during Major Aortic Replacement Surgery: A Randomized, Placebo-controlled Trial: Erratum

1244

### ■ CAREERS & EVENTS

23A

## INSTRUCTIONS FOR AUTHORS

The most recently updated version of the Instructions for Authors is available at [www.anesthesiology.org](http://www.anesthesiology.org). Please refer to the Instructions for the preparation of any material for submission to ANESTHESIOLOGY.

Manuscripts submitted for consideration for publication must be submitted in electronic format. The preferred method is via the Journal's Web site (<http://www.anesthesiology.org>). Detailed directions for submissions and the most recent version of the Instructions for Authors can be found on the Web site (<http://www.anesthesiology.org>). Books and educational materials should be sent to Michael J. Avram, Ph.D., Department of Anesthesiology, Northwestern University Feinberg School of Medicine, Ward Memorial Building, Room 13-199, 303 East Chicago Avenue, Chicago, IL 60611-3008. Requests for permission to duplicate materials published in ANESTHESIOLOGY should be submitted in electronic format, to the Permissions Department ([journalpermissions@lww.com](mailto:journalpermissions@lww.com)). Advertising and related correspondence should be addressed to Advertising Manager, ANESTHESIOLOGY, Lippincott Williams & Wilkins, Two Commerce Square, 2001 Market Street, Philadelphia, Pennsylvania 19103 (Web site: <http://www.lww.com/advertisingratecards/>). Publication of an advertisement in ANESTHESIOLOGY does not constitute endorsement by the Society or Lippincott Williams & Wilkins, Inc. of the product or service described therein or of any representations made by the advertiser with respect to the product or service.

ANESTHESIOLOGY (ISSN 0003-3022) is published monthly by Lippincott Williams & Wilkins, 16522 Hunters Green Parkway, Hagerstown, MD 21740-2116. Business office: Two Commerce Square, 2001 Market Street, Philadelphia, PA 19103. Periodicals postage paid at Hagerstown, MD, and at additional mailing offices. Copyright © 2013, the American Society of Anesthesiologists, Inc.

**Annual Subscription Rates:** *United States*—\$719 Individual, \$1309 Institution, \$289 In-training. *Rest of World*—\$759 Individual, \$1454 Institution, \$289 In-training. Single copy rate \$126. Subscriptions outside of North America must add \$52 for airfreight delivery. Add state sales tax, where applicable. The GST tax of 7% must be added to all orders shipped to Canada (Lippincott Williams & Wilkins' GST Identification #895524239, Publications Mail Agreement #1119672). Indicate in-training status and name of institution. Institution rates apply to libraries, hospitals, corporations, and partnerships of three or more individuals. Subscription prices outside the United States must be prepaid. Prices subject to change without notice. Subscriptions will begin with currently available issue unless otherwise requested. Visit us online at [www.lww.com](http://www.lww.com).

Individual and in-training subscription rates include print and access to the online version. Online-only subscriptions for individuals (\$245) and persons in training (\$245) are available to nonmembers and may be ordered by downloading a copy of the Online Subscription FAXback Form from the Web site, completing the information requested, and faxing the completed form to 301-223-2400/44 (0) 20 7981 0535. Institutional rates are for print only; online subscriptions are available via Ovid. Institutions can choose to purchase a print and online subscription together for a discounted rate. Institutions that wish to purchase a print subscription, please contact Lippincott Williams & Wilkins, 16522 Hunters Green Parkway, Hagerstown, MD 21740-2116; phone: 1-800-638-3030 (outside the United States 301-223-2300/44 (0) 20 7981 0525); fax: 301-223-2400/44 (0) 20 7981 0535. Institutions that wish to purchase an online subscription or online with print, please contact the Ovid Regional Sales Office near you or visit [www.ovid.com/site/index.jsp](http://www.ovid.com/site/index.jsp) and select Contact and Locations.

**Address for non-member subscription information, orders, or change of address:** Lippincott Williams & Wilkins, 16522 Hunters Green Parkway, Hagerstown, MD 21740-2116; phone: 1-800-638-3030 (outside the United States 301-223-2300/44 (0) 20 7981 0525); fax: 301-223-2400/44 (0) 20 7981 0535; email: [customerservice@lww.com](mailto:customerservice@lww.com). In Japan, contact LWW Japan Ltd., 3-23-14 Hongo, Bunkyo-ku, Tokyo 113, Japan; phone: 81-3-5689-5400; fax: 81-3-5689-5402; email: [bcclaim@lww.co.jp](mailto:bcclaim@lww.co.jp). In Bangladesh, India, Nepal, Pakistan, and Sri Lanka, contact Globe Publications Pvt. Ltd., B-13 3rd Floor, A Block, Shopping Complex, Naraina, Vihar, Ring Road, New Delhi 110028, India; phone: 91-11-25770411; fax: 91-11-25778876; email: [info@globepub.com](mailto:info@globepub.com).

**Address for member subscription information, orders, or change of address:** Members of the American Society of Anesthesiologists receive the print and online journal with their membership. To become a member or provide a change of address, please contact the American Society of Anesthesiologists, 520 N. Northwest Highway, Park Ridge, IL 60068-2573; phone: 847-825-5586; fax: 847-825-1692; email: [membership@ASAhq.org](mailto:membership@ASAhq.org). For all other membership inquiries, contact Lippincott Williams & Wilkins Customer Service Department, P.O. Box 1580, Hagerstown, MD 21741-1580; phone: 1-800-638-3030 (outside the United States 301-223-2300/44 (0) 20 7981 0525); fax: 301-223-2400/44 (0) 20 7981 0535; email: [memberservice@lww.com](mailto:memberservice@lww.com).

**Postmaster:** Send address changes to ANESTHESIOLOGY, P.O. BOX 1550, Hagerstown, MD 21740.

**Advertising:** Please contact Michelle Smith, Senior Account Manager, Advertising, Lippincott Williams & Wilkins, 333 Seventh Avenue, 19th Floor, New York, NY 10001; tel: (646) 674-6537, fax: (646) 607-5479, e-mail: [Michelle.Smith@wolterskluwer.com](mailto:Michelle.Smith@wolterskluwer.com). For classified advertising: Keida Spurlock, Recruitment Advertising Representative, Lippincott Williams & Wilkins, Two Commerce Square, 2001 Market Street, Philadelphia, PA 19103; tel: (215) 521-8501, fax: (215) 689-2453, e-mail: [Keida.Spurlock@wolterskluwer.com](mailto:Keida.Spurlock@wolterskluwer.com).
